# Supplementary material for: The nuclear factor CECR2 promotes somatic cell reprogramming by reorganizing the chromatin structure
Source: PubMed Central journal article supplement (PMC7948406; doi:10.1074/jbc.ra120.014598), 2020-11-23
Supplement: mmc1.pdf [file mmc1.pdf]

# Supplementary Figure 1

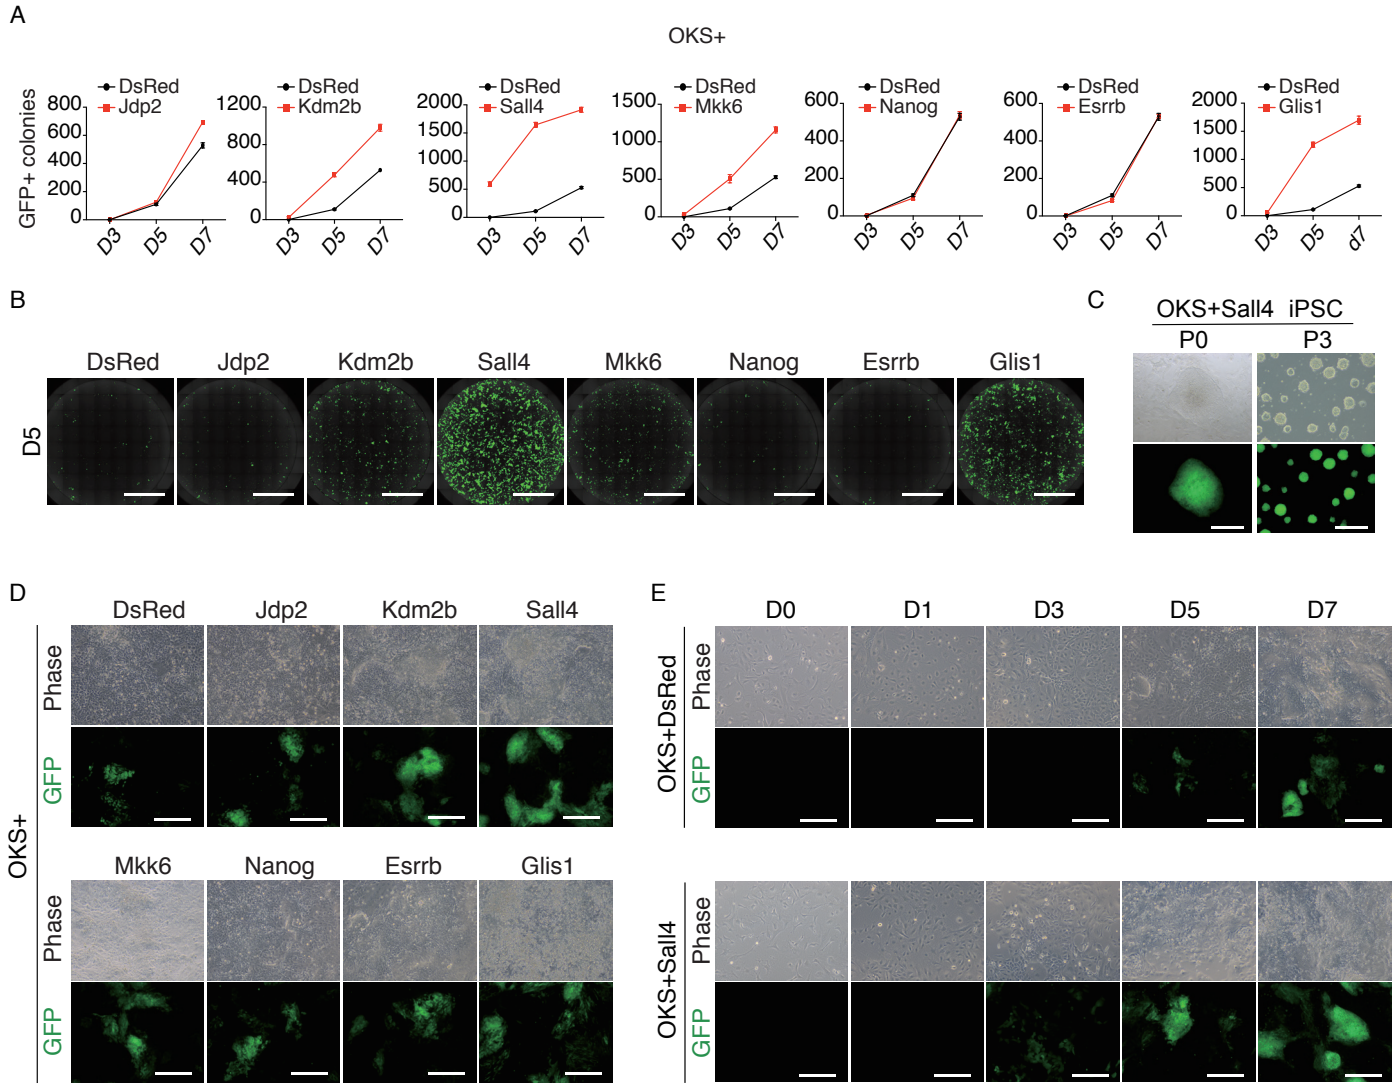

**Supplementary Figure 1. Related to Figure 1.**

**Sall4 Enhanced OKS Induced Reprogramming.**

(A) Number of time course Oct4-GFP+ colonies from 10,000 OG2MEFs infected with OKS+ DsRed/Jdp2/Kdm2b/Sall4/Mkk6/Nanog/Esrrb/Glis1 in iCD1 culture conditions in 7 days (n=6 wells from three independent experiments).

(B) Images for (A) at day 5. Scale bars, 5mm.

(C) Morphology of iPSCs from OKS+Sall4 treatment. Scale bars, 250  $\mu$ m.

(D) Images for Figure 1B. Scale bars, 250  $\mu$ m.

(E) Representative images of the OG2MEF reprogramming process at different time points. Scale bars, 250  $\mu$ m.

# Supplementary Figure 2

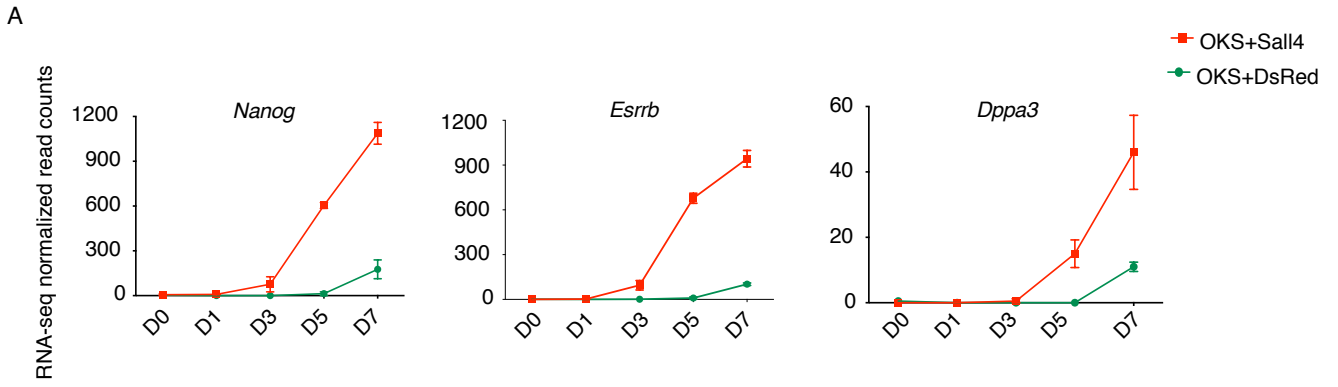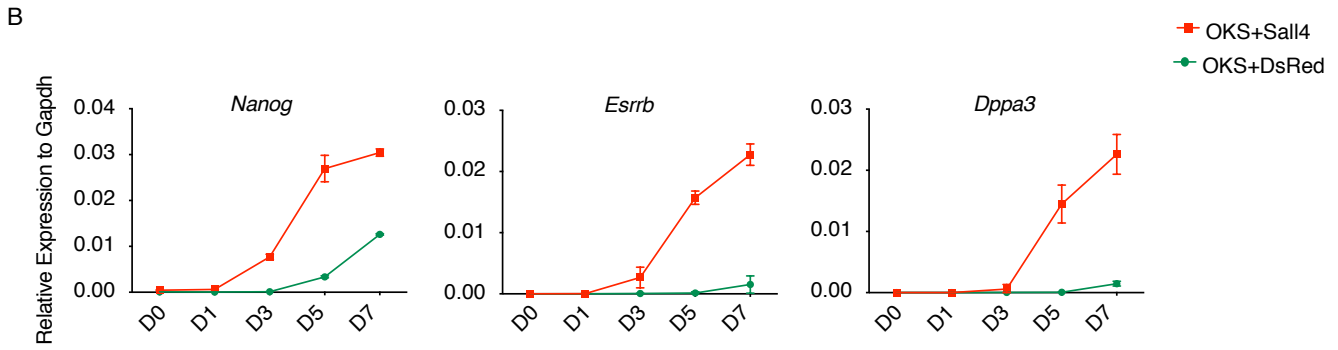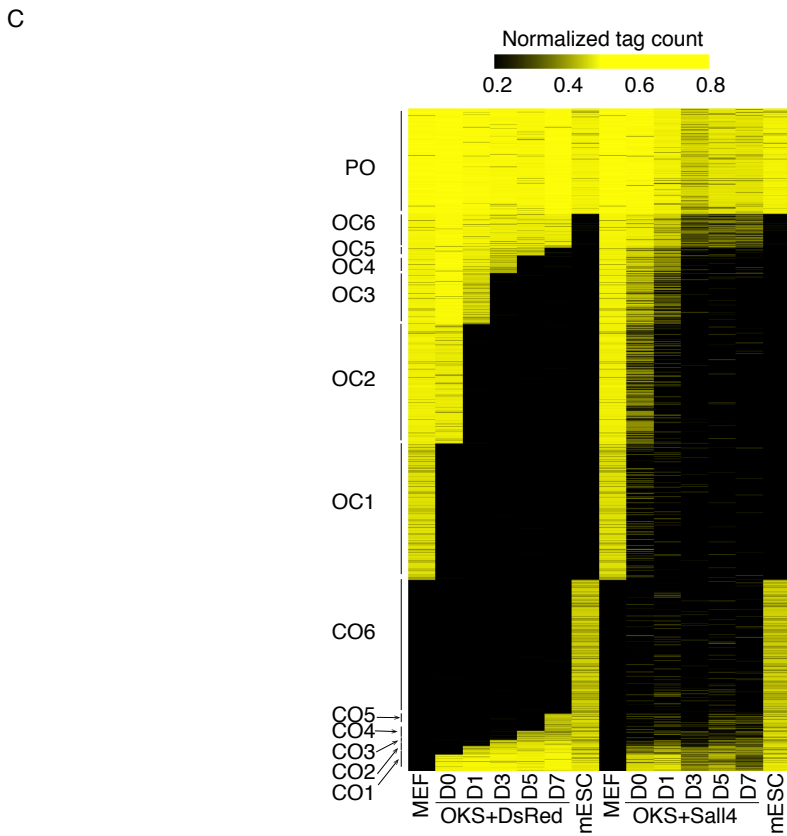

**Supplementary Figure 2. Related to Figure 2.**

**The overexpression of Sall4 in OKS affects pluripotent genes expression and chromatin state.**

(A) The expression level of genes in Figure 2C from RNA-seq data.

Pluripotency related genes were upregulated in OKS+Sall4 reprogramming.

(B) qPCR analysis of the expression of genes in (A).

(C) CADs for OKS+DsRed and OKS+Sall4. CO, Close-Open; OC, Open-Close;

PO, Permanently Open; OC6(OCF), open during but close in ESCs;

CO6(COF), closed during but open in ESCs.

# Supplementary Figure 3

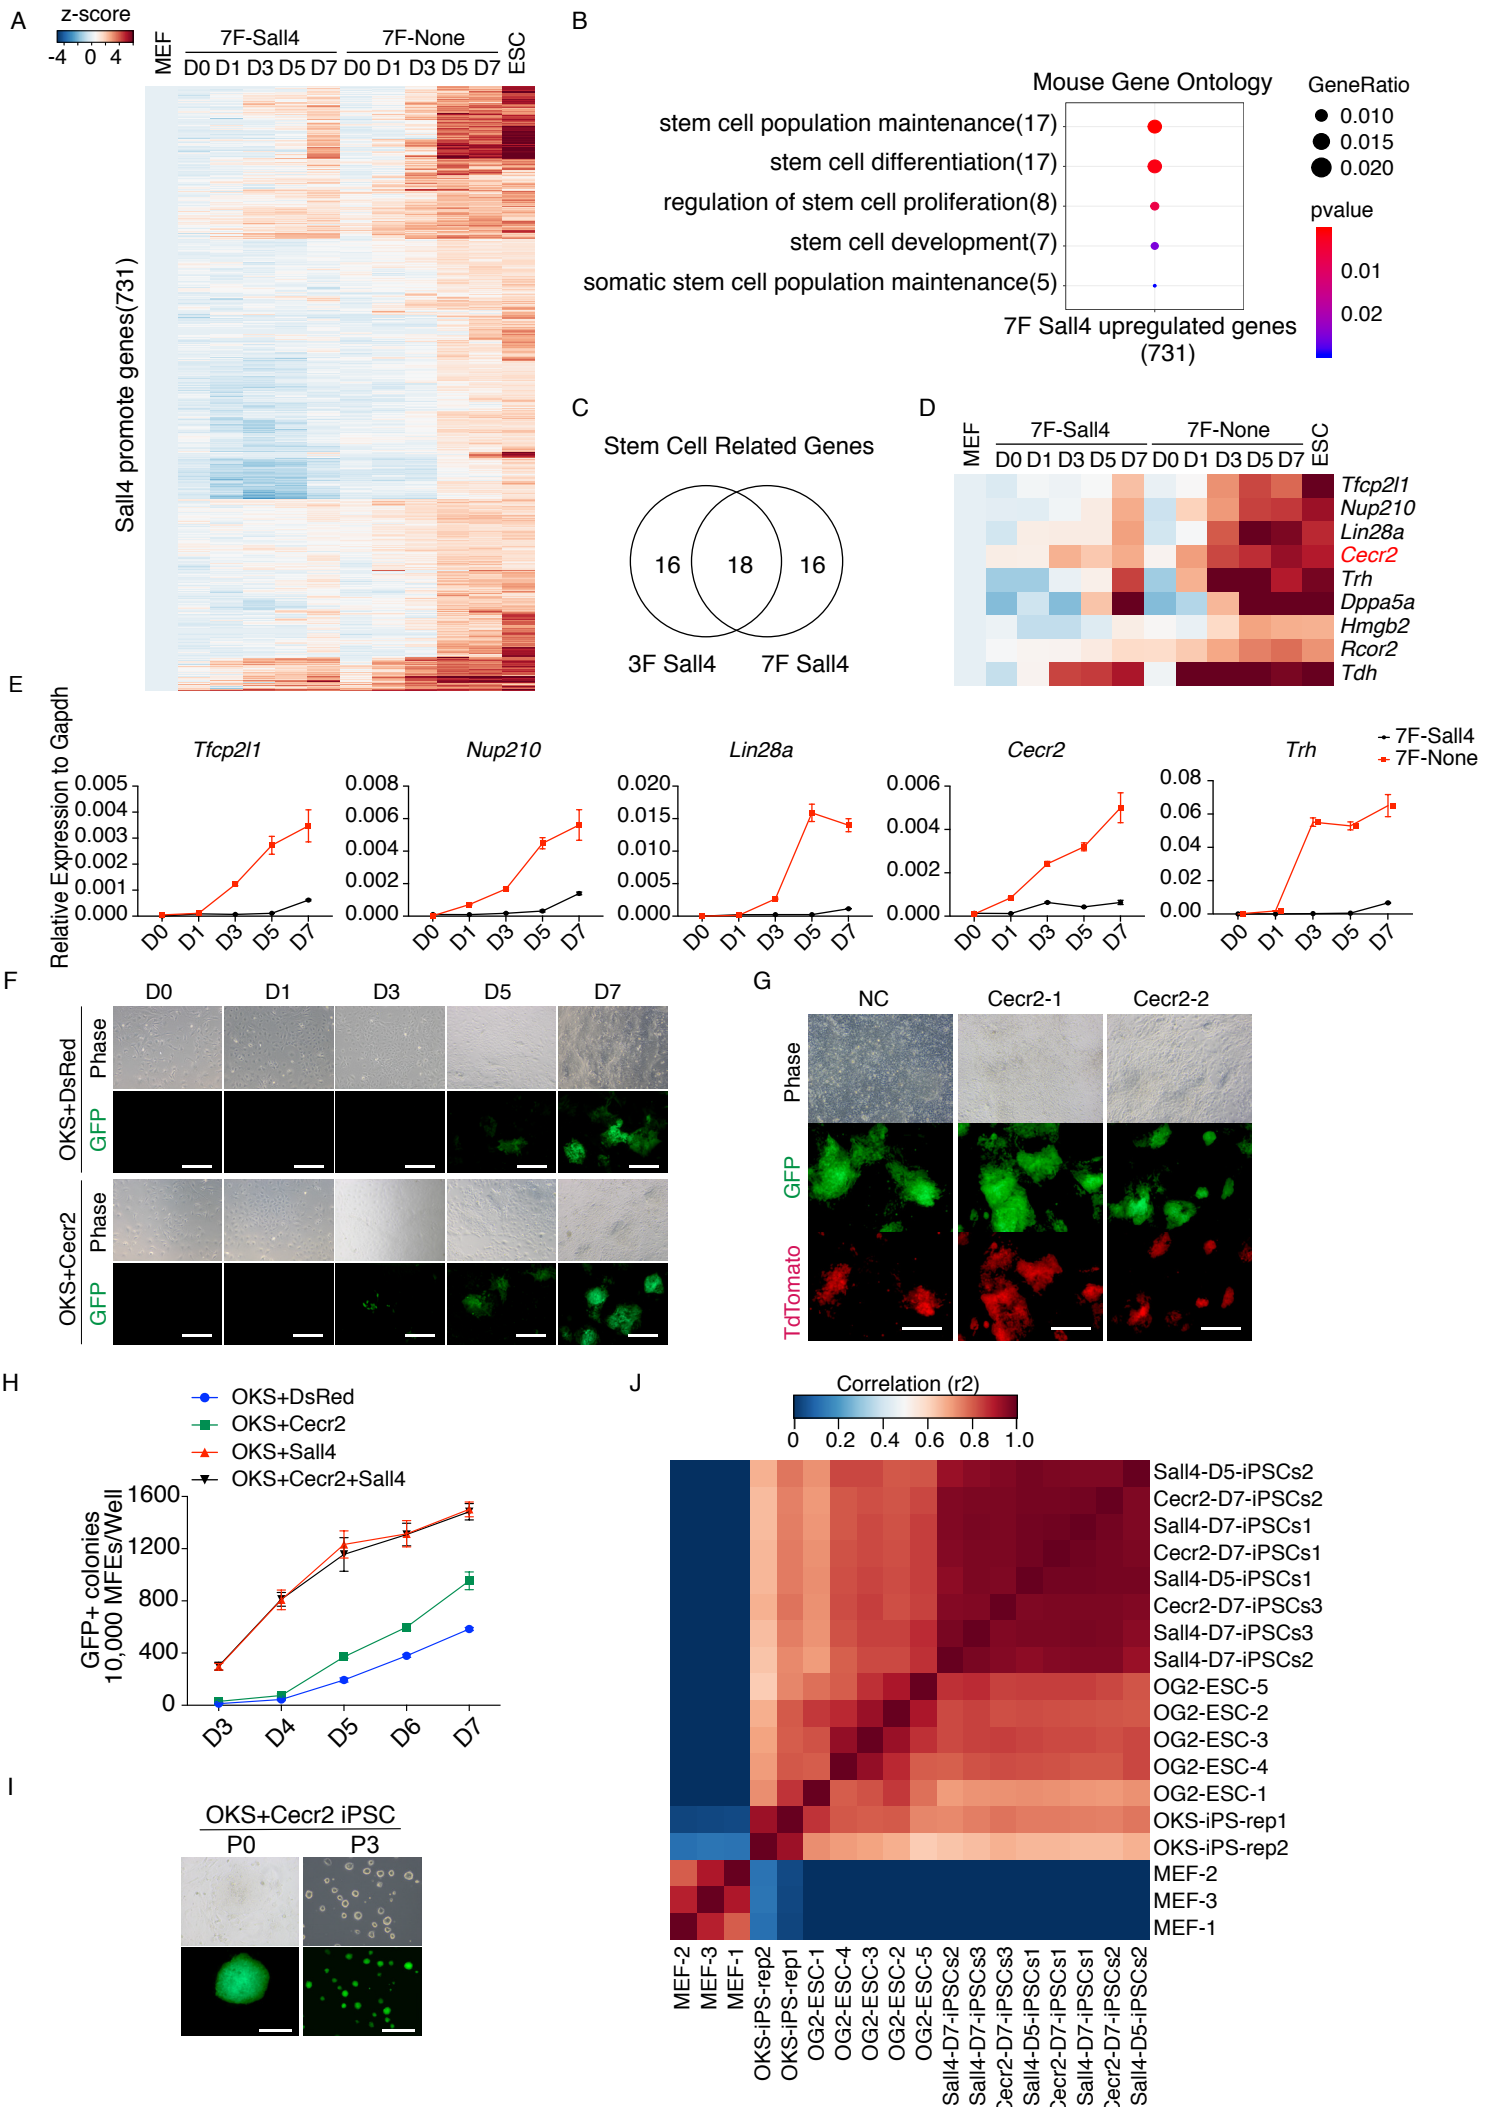

**Supplementary Figure 3. Related to Figure 3.**

**Sall4's downstream gene Cecr2 could enhance OKS induced reprogramming.**

- (A) Heatmap for the RNA-seq data of 7F and 7F-Sall4 showed Sall4 upregulated genes.
- (B) Gene Ontology (GO) analysis for genes upregulated mediated by Sall4 during 7F reprogramming.
- (C) Stem cell related genes upregulated by Sall4 during OKS+Sall4 or 7F reprogramming.
- (D) The expression level of Sall4's downstream gene in 7F reprogramming.
- (E) qPCR analysis of the expression of genes in (D).
- (F) Representative images of the OG2MEF reprogramming process at different time points. Scale bars, 250  $\mu\text{m}$ .
- (G) Images of Reprogrammed OD MEF in day7. Scale bars, 250  $\mu\text{m}$ .
- (H) The overexpression of Cecr2 in OKS+Sall4 couldn't further improve reprogramming efficiency.
- (I) Morphology of iPSCs from OKS+Sall4 treatment. Scale bars, 250  $\mu\text{m}$ .
- (J) The R2 correlation coefficient matrix of all versus all RNA-seq datasets as indicated.

# Supplementary Figure 4

A

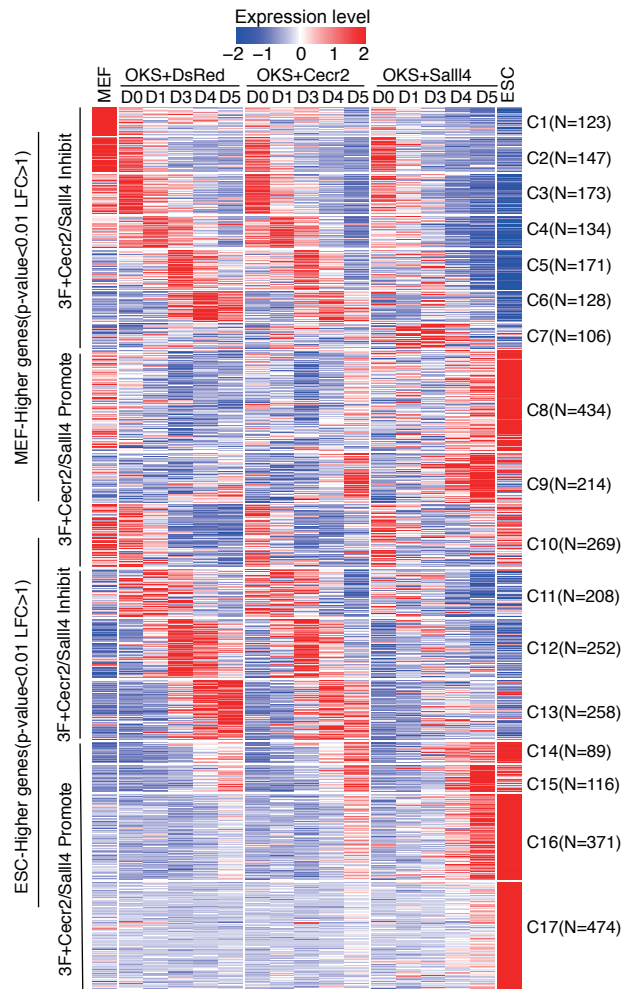

B

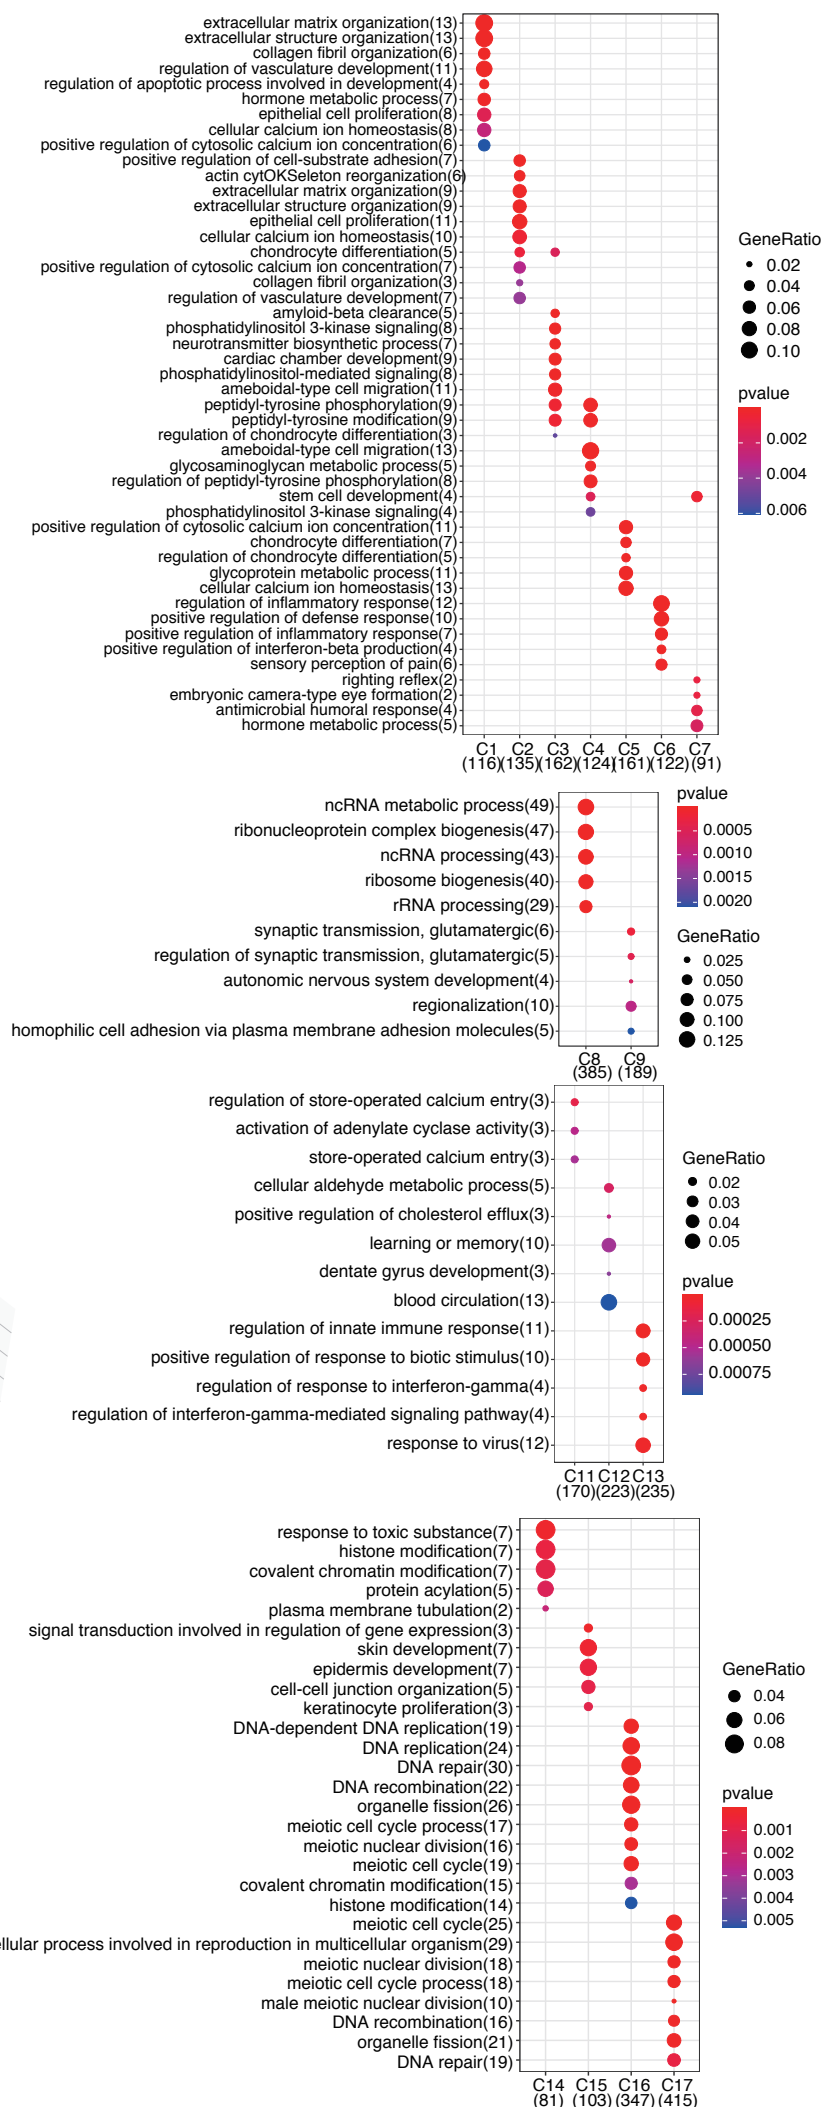

C

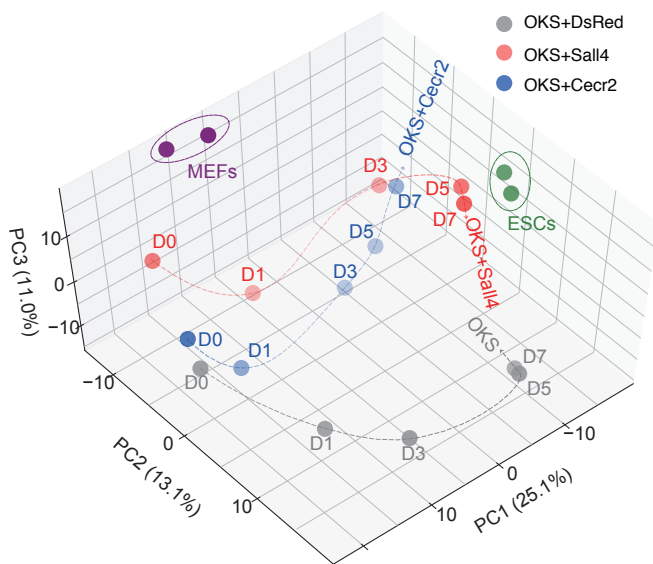

**Supplementary Figure 4. Related to Figure 4.**

**The relationship between Cecr2 and Sall4 in reprogramming.**

(A) Heatmaps for the RNA-seq data of MEF, OKS+Cecr2, OKS+Sall4 and ESC.

MEFs infected with DsRed as Control.

(B) Gene Ontology (GO) analysis for genes in (A).

(C) ATAC-seq data shows similarities between OKS+Cecr2 and OKS+Sall4 reprogramming.



# Supplementary Figure 5

A

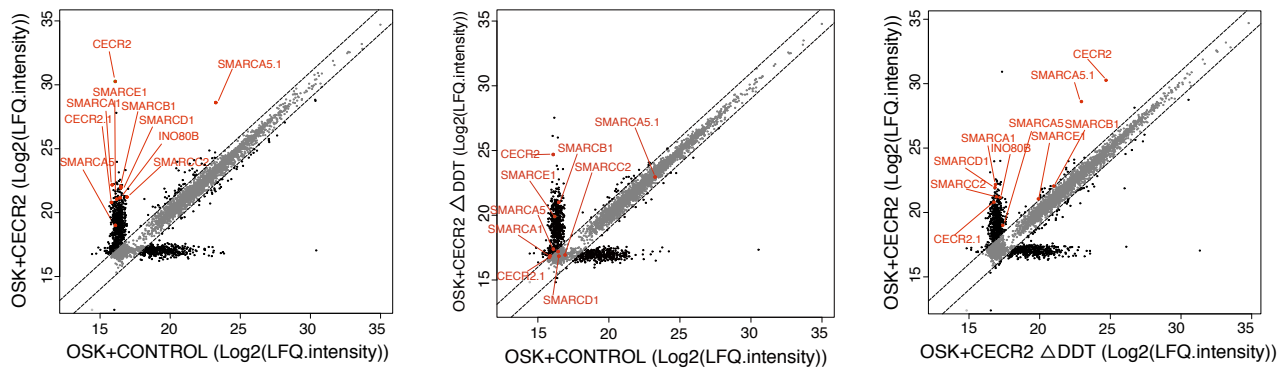

B

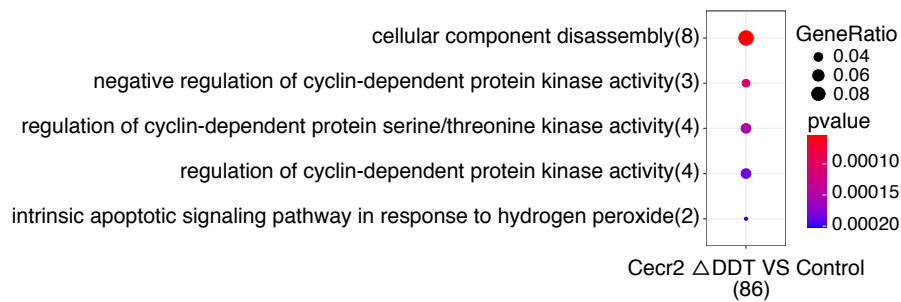

**Supplementary Figure 5. Related to Figure 5.**

**The endogenous IP MS results showed that CECR2 interacted with SNF2L and other chromatin remodeling related proteins.**

(A) Scatter plot showed FLAG IP MS result of OKS+Cecr2-3×Flag compared to OKS+DsRed-3×Flag(Control), OKS+Cecr2  $\Delta$ DDT-3×Flag compared to OKS+DsRed-3×Flag(Control) and OKS+Cecr2-3×Flag compared to OKS+Cecr2  $\Delta$ DDT-3×Flag in day3 of reprogramming.

(B) GO analysis of top 100 proteins enriched in OKS+Cecr2  $\Delta$ DDT-3×Flag compared to OKS+DsRed-3×Flag(Control) reprogramming in day3 through FLAG-IP MS.

# Supplementary Figure 6

A

Summary of Embryo Injection

| <i>Cecr2</i> <sup>-/-</sup> mESC | Injected Embryos | Recipient Females | Lived Embryos |
|----------------------------------|------------------|-------------------|---------------|
| Tetraploid                       | 178              | 8                 | 0             |
| Chimera                          | 159              | 9                 | 10            |

B

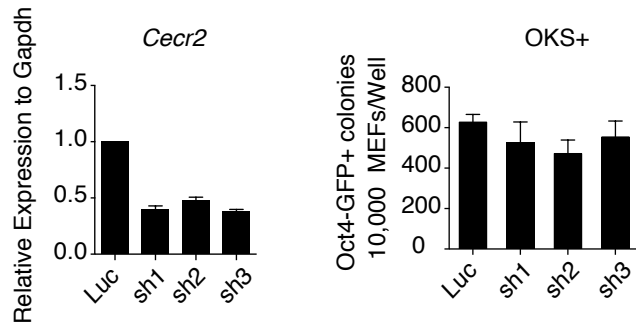

**Supplementary Figure 6. Related to Figure 6.**

**The knockdown of Cecr2 in OKS induced reprogramming.**

(A) Table summarizing Cecr2 knockout(KO) MEFs produced by blastocyst injection with Cecr2 knockout mESCs.

The knockdown of Cecr2 by shRNA had little effect on OKS reprogramming.
